# Supplementary material for: Characteristics of the specific humoral response in patients with advanced solid tumors after active immunotherapy with a VEGF vaccine, at different antigen doses and using two distinct adjuvants
Source: PubMed Central journal article supplement (PMC5530503; doi:10.1186/s12865-017-0222-z), 2017-07-26
Supplement: 12865_2017_222_MOESM1_ESM.pdf [file 12865_2017_222_MOESM1_ESM.pdf]

**Additional file 1.** Reported adverse events which were probably or definitively related to the vaccine during trial period.

| Cohort<br>Event/Grading | Ag+V  |      | Ag+2V |      |      | 2Ag+V | $\frac{1}{2}$ Ag+Al | Ag+Al | Totals  |
|-------------------------|-------|------|-------|------|------|-------|---------------------|-------|---------|
|                         | I     | III  | I     | II   | III  | I     | I                   | I     |         |
| IS erythema             | 19    | 0    | 42    | 0    | 0    | 31    | 10                  | 20    | 122     |
| IS pain                 | 9     | 0    | 17    | 0    | 0    | 24    | 6                   | 11    | 67      |
| IS lump                 | 1     | 0    | 7     | 0    | 0    | 4     | 5                   | 5     | 22      |
| IS warmth               | 1     | 0    | 0     | 0    | 0    | 2     | 0                   | 1     | 4       |
| IS edema                | 1     | 0    | 1     | 0    | 0    | 0     | 1                   | 0     | 3       |
| IS pruritus             | 1     | 0    | 1     | 0    | 0    | 0     | 0                   | 0     | 2       |
| IS weal                 | 0     | 0    | 0     | 0    | 0    | 1     | 0                   | 0     | 1       |
| IS paresthesia          | 1     | 0    | 0     | 0    | 0    | 0     | 0                   | 0     | 1       |
| Asthenia                | 0     | 1    | 0     | 0    | 0    | 0     | 1                   | 0     | 2       |
| Fever                   | 1     | 0    | 4     | 0    | 0    | 2     | 0                   | 0     | 7       |
| Malaise                 | 5     | 0    | 1     | 0    | 0    | 0     | 0                   | 0     | 6       |
| Pseudo flu              | 0     | 0    | 2     | 0    | 0    | 2     | 0                   | 0     | 4       |
| Chills                  | 0     | 0    | 0     | 0    | 0    | 1     | 0                   | 0     | 1       |
| Allergic reaction       | 0     | 0    | 0     | 1    | 0    | 0     | 0                   | 0     | 1       |
| Headache                | 0     | 0    | 0     | 0    | 0    | 1     | 0                   | 0     | 1       |
| Hypertension            | 0     | 0    | 0     | 0    | 1    | 2     | 0                   | 0     | 3       |
| Tachycardia             | 0     | 0    | 1     | 0    | 0    | 0     | 0                   | 0     | 1       |
| Arthralgia              | 3     | 0    | 0     | 0    | 0    | 0     | 0                   | 0     | 3       |
| Bone pain               | 0     | 0    | 0     | 0    | 0    | 1     | 0                   | 0     | 1       |
| Myalgia                 | 0     | 0    | 0     | 0    | 0    | 1     | 0                   | 0     | 1       |
| Totals                  | 42[6] | 1[1] | 76[7] | 1[1] | 1[1] | 72[7] | 23[4]               | 37[5] | 253[29] |

IS, injection site; number of individual patients with the adverse event in square brackets.
