# Supplementary material for: Characteristics of the specific humoral response in patients with advanced solid tumors after active immunotherapy with a VEGF vaccine, at different antigen doses and using two distinct adjuvants
Source: PubMed Central journal article supplement (PMC5530503; doi:10.1186/s12865-017-0222-z), 2017-07-26
Supplement: 12865_2017_222_MOESM3_ESM.pdf [file 12865_2017_222_MOESM3_ESM.pdf]

**Additional file 3.** Detection of specific-IgG, IgM or IgA immunoglobulin classes at the end of trial vaccinations (week 13).

|                       | <b>Patients</b> | <b>IgG</b> | <b>IgM</b> | <b>IgA</b> |
|-----------------------|-----------------|------------|------------|------------|
| <b>Group Ag+V</b>     | CQ03            | +          | -          | -          |
|                       | CH04            | -          | -          | -          |
|                       | CH17            | +          | -          | -          |
|                       | CH24            | +          | -          | -          |
|                       | CH32            | +          | -          | +          |
|                       | JL41            | +          | +          | +          |
|                       | JL42            | +          | -          | -          |
| <b>Group Ag+2V</b>    | CH15            | -          | -          | -          |
|                       | CH19            | +          | +          | +          |
|                       | CH27            | +          | -          | -          |
|                       | CH39            | -          | -          | -          |
|                       | JL49            | +          | +          | -          |
|                       | JL22            | -          | -          | -          |
|                       | CH06            | +          | -          | +          |
|                       | CQ44            | -          | -          | -          |
| <b>Group 2Ag+V</b>    | CH16            | +          | +          | +          |
|                       | JL29            | +          | -          | +          |
|                       | JL30            | +          | -          | -          |
|                       | CH33            | +          | +          | +          |
|                       | JL43            | +          | -          | -          |
|                       | CH50            | +          | -          | +          |
|                       | JL12            | +          | +          | -          |
| CH35                  | +               | -          | +          |            |
| <b>Group 1/2Ag+AI</b> | CH08            | -          | -          | -          |
|                       | CH09            | -          | -          | -          |
|                       | CH20            | -          | -          | -          |
|                       | CH25            | -          | -          | -          |
|                       | CH46            | -          | -          | -          |
|                       | JL47            | -          | -          | -          |
|                       | CH18            | -          | -          | -          |
| JL23                  | +               | -          | -          |            |
| <b>Group Ag+AI</b>    | CH07            | +          | -          | -          |
|                       | CQ13            | +          | -          | -          |
|                       | CQ28            | +          | -          | -          |
|                       | CH37            | +          | -          | -          |
|                       | CH45            | +          | +          | +          |
|                       | JL48            | +          | -          | +          |
|                       | JL11            | -          | -          | -          |
|                       | CH10            | +          | -          | -          |

(+): sample meets acceptance criteria for antibody titer; (-): sample does not meet acceptance criteria for antibody titer.
