# Supplementary material for: Characteristics of the specific humoral response in patients with advanced solid tumors after active immunotherapy with a VEGF vaccine, at different antigen doses and using two distinct adjuvants
Source: PubMed Central journal article supplement (PMC5530503; doi:10.1186/s12865-017-0222-z), 2017-07-26
Supplement: 12865_2017_222_MOESM5_ESM.pdf [file 12865_2017_222_MOESM5_ESM.pdf]

**Additional file 5.** Off-trial re-immunizations.

| <b>Patient Code</b>                                                                                | <b>Number of re-immunizations</b> | <b>Sample evaluations (weeks)</b> | <b>Time of dose change (week)</b> |
|----------------------------------------------------------------------------------------------------|-----------------------------------|-----------------------------------|-----------------------------------|
| <b>Vaccination dose: 400µg antigen+200µg VSSP</b>                                                  |                                   |                                   |                                   |
| CQ03                                                                                               | 7                                 | (16)                              | No                                |
| CH04                                                                                               | 3                                 | (16)                              | No                                |
| CH17                                                                                               | 5                                 | (16)                              | No                                |
| CH24                                                                                               | 4                                 | (16,24)                           | No                                |
| CH32                                                                                               | 6                                 | (16,24,32)                        | No                                |
| JL41                                                                                               | 5                                 | (16,18,28)                        | No                                |
| JL42                                                                                               | 10                                | (16,18,28,36,44,49,50)            | No                                |
| <b>From initial vaccination dose [400µg antigen+400µg VSSP] to 800µg antigen+200µg VSSP</b>        |                                   |                                   |                                   |
| CH15                                                                                               | 1                                 | (16)                              | No                                |
| CH19                                                                                               | 9                                 | (16,32,40,47,48)                  | (36)                              |
| CH27                                                                                               | 9                                 | (16,32,45,46)                     | (36)                              |
| CH39                                                                                               | 4                                 | (16,24,28)                        | (28)                              |
| JL49                                                                                               | 9                                 | (16,24,30,38,44,45)               | (28)                              |
| <b>Vaccination dose: 800µg antigen+200µg VSSP</b>                                                  |                                   |                                   |                                   |
| CH16                                                                                               | 8                                 | (16,32)                           | No                                |
| JL29                                                                                               | 10                                | (16,32,40,48,49)                  | No                                |
| JL30                                                                                               | 11                                | (16,34,42,50,52,53,60)            | No                                |
| CH33                                                                                               | 9                                 | (16,24,32,40,48,49)               | No                                |
| JL43                                                                                               | 5                                 | (16,18,28)                        | No                                |
| CH50                                                                                               | 2                                 | (16)                              | No                                |
| JL12                                                                                               | 9                                 | (16,20,40,53,54)                  | No                                |
| <b>From initial antigen dose [200µg antigen+0.7mg Al<sup>3+</sup>] to 800µg antigen+200µg VSSP</b> |                                   |                                   |                                   |
| CH08                                                                                               | 9                                 | (16,55,56)                        | (44)                              |
| CH09                                                                                               | 1                                 | (16)                              | No                                |
| CH20                                                                                               | 9                                 | (16,36,46,50,51)                  | (40)                              |
| CH25                                                                                               | 1                                 | (16)                              | No                                |
| CH46                                                                                               | 4                                 | (16,24,36)                        | (28)                              |
| JL47                                                                                               | 1                                 | (16)                              | No                                |
| <b>From initial antigen dose [400µg antigen+0.7mg Al<sup>3+</sup>] to 800µg antigen+200µg VSSP</b> |                                   |                                   |                                   |
| CH07                                                                                               | 9                                 | (16,40,48)                        | (40)                              |
| CQ13                                                                                               | 9                                 | (16,36,48,49)                     | (44)                              |
| CQ28                                                                                               | 1                                 | (16,30)                           | No                                |
| CH37                                                                                               | 1                                 | (16)                              | No                                |
| CH45                                                                                               | 8                                 | (16,24,28,32,40,48,49)            | (36)                              |
| JL48                                                                                               | 4                                 | (16,24)                           | (28)                              |
| JL11                                                                                               | 1                                 | (16)                              | No                                |
