# Supplementary material for: Characteristics of the specific humoral response in patients with advanced solid tumors after active immunotherapy with a VEGF vaccine, at different antigen doses and using two distinct adjuvants
Source: BMC Immunol. 2017 Jul 26;18:39. doi: 10.1186/s12865-017-0222-z (PMC5530503; doi:10.1186/s12865-017-0222-z)
Supplement: Supplementary file 2 — IgE antibody titers specific to human VEGF. (XLSX 13 kb) [file 12865_2017_222_MOESM2_ESM.xlsx]

## Sheet: Sheet1
IgE antibody titers specific to human VEGF
	weeks
CH08	0	13	55	56
antibody titer	0	0	0	0
	weeks
JL12	0	13	53	54
antibody titer	0	0	0	0
	weeks
CQ13	0	13	48	49
antibody titer	0	0	0	0
	weeks
CH19	0	13	47	48
antibody titer	0	0	0	0
	weeks
CH20	0	13	50	51
antibody titer	0	0	0	0
	weeks
CH27	0	13	45	46
IgE titer	0	0	0	0
	weeks
JL29	0	13	48	49
antibody titer	0	0	0	0
	weeks
CH33	0	13	48	49
antibody titer	0	0	0	0
	weeks
JL42	0	13	49	50
antibody titer	0	0	0	0
	weeks
CH45	0	13	48	49
antibody titer	0	0	0	0
	weeks
JL49	0	13	44	45
antibody titer	0	0	0	0
	weeks
JL30	0	13
antibody titer	0	0
	weeks
CQ03	0	13
antibody titer	0	0
	weeks
CH04	0	13
IgE titer	0	0
	weeks
CH06	0	13
antibody titer	0	0
	weeks
CH07	0	13
antibody titer	0	0
	weeks
CH09	0	13
antibody titer	0	0
	weeks
CH10	0	13
antibody titer	0	0
	weeks
JL11	0	13
antibody titer	0	0
	weeks
CH15	0	13
antibody titer	0	0
	weeks
CH16	0	13
antibody titer	0	0
	weeks
CH17	0	13
IgE titer	0	0
	weeks
CH18	0	13
antibody titer	0	0
	weeks
JL22	0	13
antibody titer	0	0
	weeks
JL23	0	13
antibody titer	0	0
	weeks
CH24	0	13
antibody titer	0	0
	weeks
CH25	0	13
antibody titer	0	0
	weeks
CQ28	0	13
antibody titer	0	0
	weeks
CH32	0	13
IgE titer	0	0
	weeks
CH35	0	13
antibody titer	0	0
	weeks
CH37	0	13
antibody titer	0	0
	weeks
CH39	0	13
antibody titer	0	0
	weeks
JL41	0	13
antibody titer	0	0
	weeks
JL43	0	13
antibody titer	0	0
	weeks
CQ44	0	13
antibody titer	0	0
	weeks
CH46	0	13
antibody titer	0	0
	weeks
JL47	0	13
IgE titer	0	0
	weeks
JL48	0	13
antibody titer	0	0
	weeks
CH50	0	13
antibody titer	0	0
